# Supplementary material for: Self-polymerized hollow Mo-dopamine complex-induced functional MoSe2/N-doped carbon electrodes with enhanced lithium/sodium storage properties
Source: Royal Society of Chemistry journal article supplement (doi:10.1039/c8qi00101d), 2018-01-01
Supplement: c8qi00101d1.pdf [file c8qi00101d1.pdf]

## Supplementary Material

### Self-polymerized hollow Mo-dopamine complex-induced functional MoSe<sub>2</sub>/N-doped carbon electrodes with enhanced lithium/sodium storage properties

Chaochao Zhao, He Song, Qianyu Zhuang, Quanning Ma, Jun Liang, Hongrui Peng, Changming Mao, Zhonghua Zhang\*, Guicun Li\*

*College of Materials Science and Engineering, Qingdao University of Science and Technology, Qingdao 266042, China.*

*\*Corresponding authors. Tel.: 86-532-84022900; fax: 86-532-84022900. E-mail: [guicunli@qust.edu.cn](mailto:guicunli@qust.edu.cn)*

#### This file includes:

Figure S1 to S6:

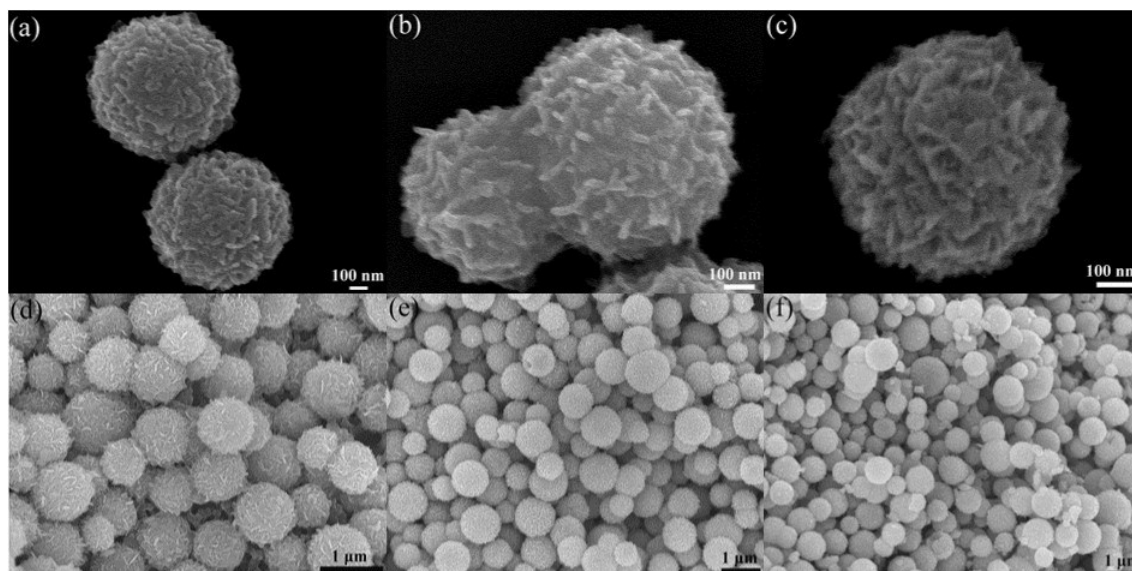

Figure S1 SEM of MoSe<sub>2</sub>/C (a, d); MoS<sub>1.8</sub>Se<sub>0.2</sub>/C (b, e); MoS<sub>2</sub>/C (c, f).

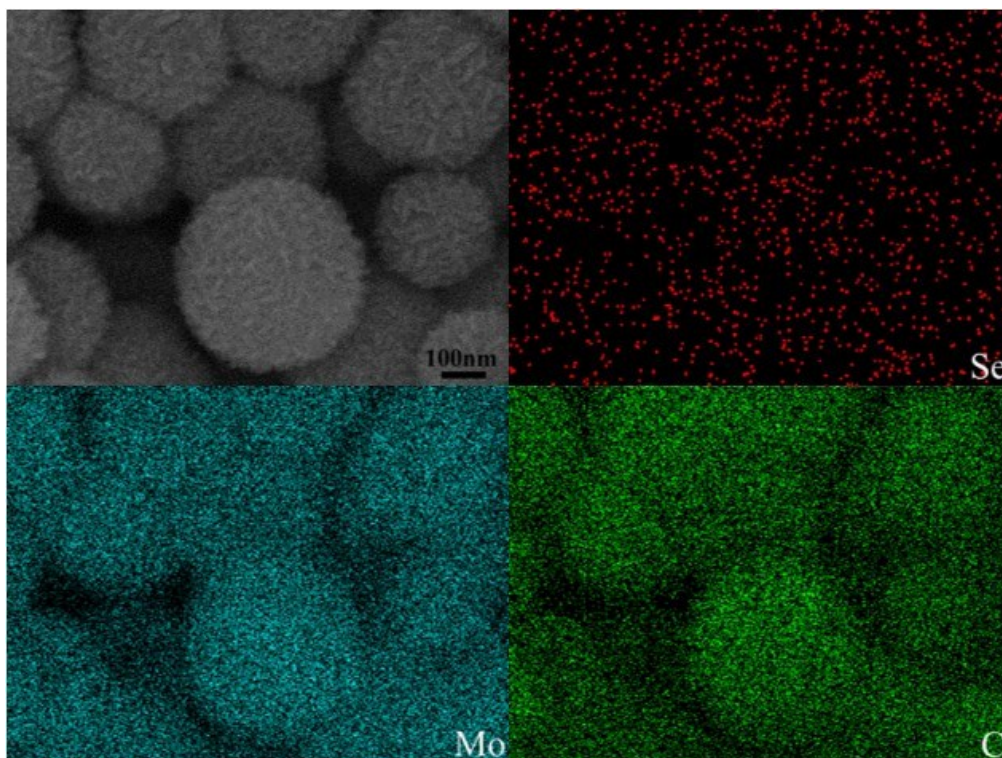

Figure S2 Elemental mapping disclose the co-existence of Se, Mo and C elements of  $\text{MoSe}_2/\text{C}$ , and further demonstrate their homogeneously distributions.

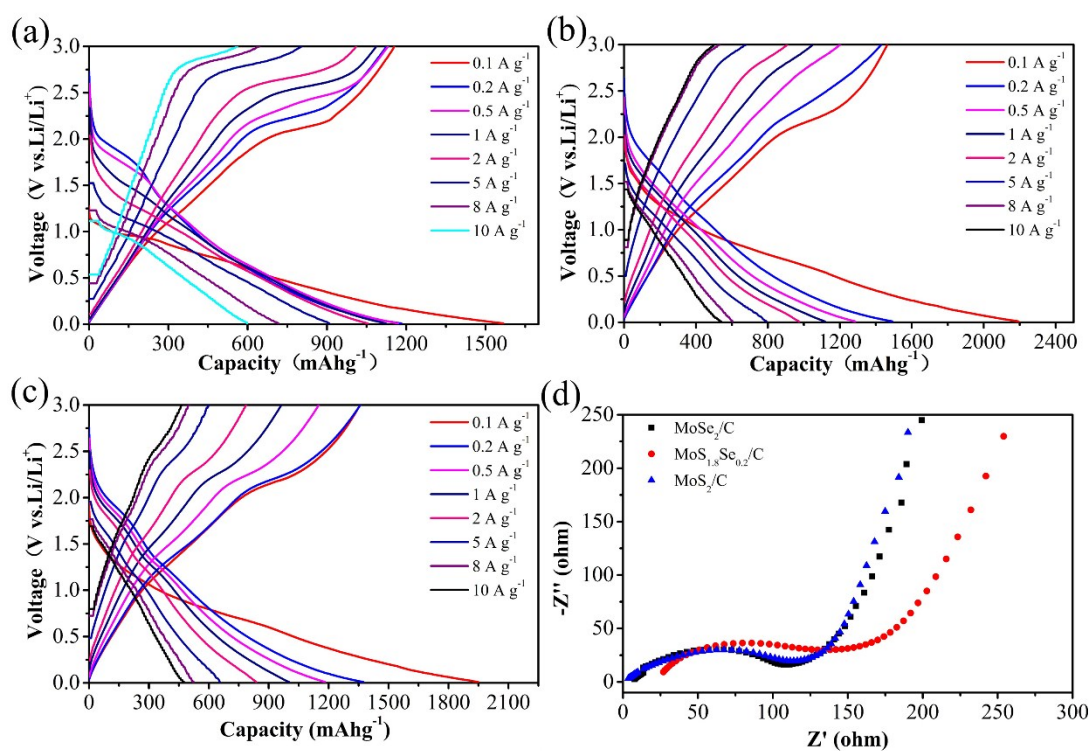

Figure S3 Galvanostatic charge-discharge profiles at current densities of  $0.1 \text{ A g}^{-1}$  and at various current densities of  $\text{MoSe}_2/\text{C}$  (a);  $\text{MoS}_{1.8}\text{Se}_{0.2}/\text{C}$  (b);  $\text{MoS}_2/\text{C}$  (c); EIS spectra the  $\text{MoSe}_2/\text{C}$ ,  $\text{MoS}_{1.8}\text{Se}_{0.2}/\text{C}$  and  $\text{MoS}_2/\text{C}$  microspheres.

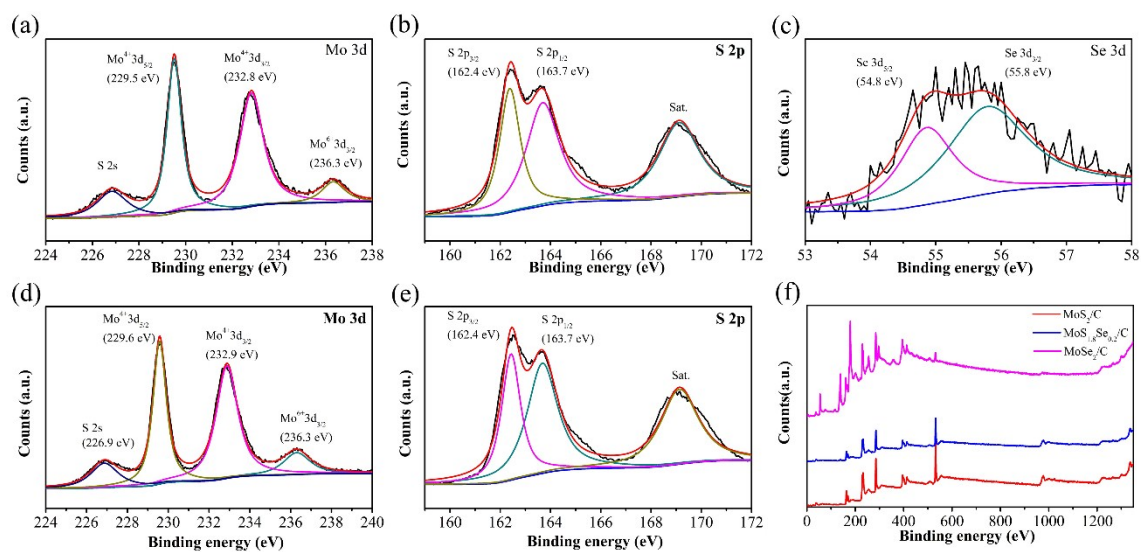

Figure S4 Wide survey XPS spectra of Mo 3d (a), S 2p (b) and Se 3d (c) of MoS<sub>1.8</sub>Se<sub>2</sub>/C; high-resolution XPS spectra of Mo 3d (d), S 2p (e) of MoS<sub>2</sub>/C; and XPS survey of MoS<sub>2</sub>/C, MoS<sub>1.8</sub>Se<sub>2</sub>/C and MoSe<sub>2</sub>/C (f).

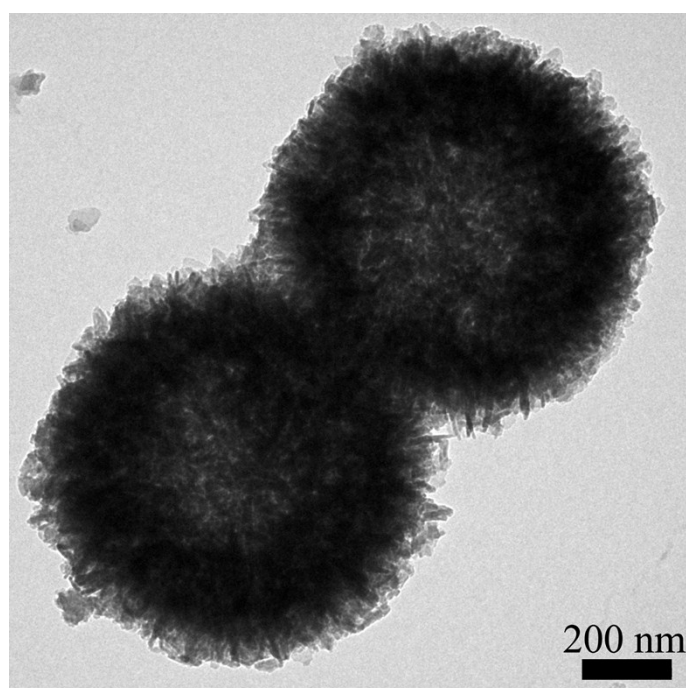

Figure S5 TEM images of Mo-dopamine precursors.

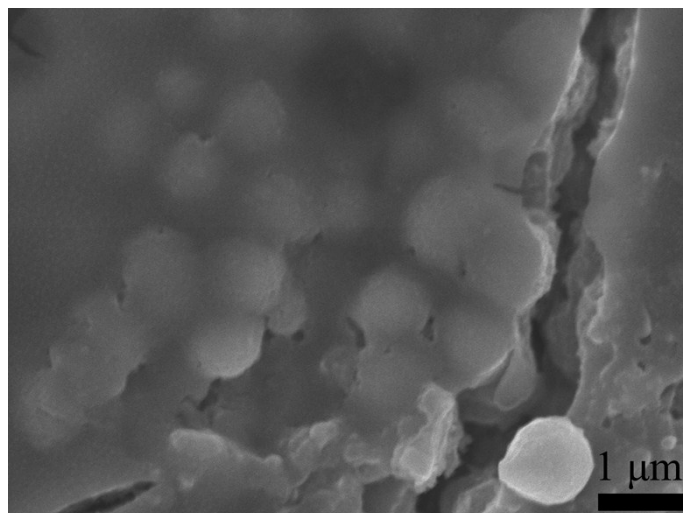

Figure S6 SEM morphology of MoSe<sub>2</sub>/C microspheres after 5 cycles at 0.1 A g<sup>-1</sup>.
